# Supplementary material for: The Neutrophil/Lymphocyte Ratio and Outcomes in Hospitalized Patients with Community-Acquired Pneumonia: A Retrospective Cohort Study
Source: MDPI journal article supplement (doi:10.3390/biomedicines12020260), 2024-01-24
Supplement: s1 [file s1]

**Supplementary Table S1. Demographics and clinical characteristics of patients according to their neutrophil-lymphocyte ratio levels\*:**

| Variables                                         | Quartile #1<br>(n=1010) | Quartile #2<br>(n=1010) | Quartile #3<br>(n=1009) | Quartile #4<br>(n=1010) | P value          |
|---------------------------------------------------|-------------------------|-------------------------|-------------------------|-------------------------|------------------|
| <b>Age, median (IQR)</b>                          | 76 (63, 88)             | 78 (65, 88)             | 79 (67, 88)             | 79 (67, 88)             | <b>0.020</b>     |
| <b>Sex , no. (%)</b>                              |                         |                         |                         |                         | <b>&lt;0.001</b> |
| Male                                              | 499 (49.4)              | 519 (51.4)              | 563 (55.8)              | 591 (58.5)              |                  |
| <b>Race, no. (%)</b>                              |                         |                         |                         |                         | <b>0.002**</b>   |
| White                                             | 928 (91.9)              | 955 (94.6)              | 954 (94.5)              | 968 (95.8)              |                  |
| Asian                                             | 15 (1.5)                | 12 (1.2)                | 9 (0.9)                 | 6 (0.6)                 |                  |
| African American                                  | 32 (3.2)                | 14 (1.4)                | 11 (1.1)                | 7 (0.7)                 |                  |
| Others                                            | 35 (3.5)                | 29 (2.8)                | 35 (3.5)                | 29 (2.9)                |                  |
| <b>Ethnicity, no. (%)</b>                         |                         |                         |                         |                         | 0.650            |
| Non-Hispanic                                      | 978 (96.8)              | 972 (96.2)              | 970 (96.1)              | 977 (96.7)              |                  |
| Hispanic                                          | 16 (1.6)                | 21 (2.1)                | 15 (1.5)                | 13 (1.3)                |                  |
| Unknown/Other                                     | 16 (1.6)                | 17 (1.7)                | 24 (2.4)                | 20 (2)                  |                  |
| <b>Comorbidities, no. (%)</b>                     |                         |                         |                         |                         |                  |
| Congestive heart failure                          | 297 (29.4)              | 287 (28.4)              | 256 (25.4)              | 278 (27.5)              | 0.215            |
| COPD                                              | 286 (28.3)              | 308 (30.5)              | 309 (30.6)              | 407 (40.3)              | <b>&lt;0.001</b> |
| Diabetes                                          | 335 (33.2)              | 305 (30.2)              | 304 (30.1)              | 276 (27.3)              | <b>0.042</b>     |
| Chronic kidney disease                            | 299 (29.6)              | 296 (29.3)              | 258 (25.6)              | 306 (30.3)              | 0.083            |
| Malignancy                                        | 226 (22.4)              | 249 (24.7)              | 214 (21.2)              | 259 (25.6)              | 0.072            |
| <b>Neutrophil/lymphocyte ratio, median, (IQR)</b> | 3.35 (2.37, 4.27)       | 7.04 (6.09, 8.19)       | 12.06 (10.65, 14.05)    | 24.55 (19.79, 33.82)    | <b>0.000</b>     |
| <b>Clinical Severity Scores</b>                   |                         |                         |                         |                         |                  |
| Pneumonia Severity Index, median (IQR )           | 105 (80, 136)           | 111 (85, 137)           | 113 (88, 139)           | 121 (95, 152)           | <b>&lt;0.001</b> |
| CURB 65                                           | 2 (2, 3)                | 3 (2, 3)                | 3 (2, 3)                | 3 (2, 4)                | <b>&lt;0.001</b> |
| APACHE III                                        | 64 (51, 80)             | 65 (51, 78)             | 62 (49, 77)             | 68 (56, 82)             | <b>&lt;0.001</b> |

APACHE: Acute Physiology and Chronic Health Evaluation, CI: Confidence interval, COPD: Chronic Obstructive Pulmonary Disease, NLR: Neutrophil Lymphocyte ratio, IQR: interquartile range, OR: Odds ratio.

\* neutrophil-lymphocyte ratio levels per quartiles: Quartile #1, <5.13; Quartile #2, ≥5.13 and <9.26; Quartile #3, ≥9.26 and <16.35; Quartile #4, ≥16.35.

\*\* To address the issue of a high number of cells having an expected count of less than 5, the race categories were merged for comparison purposes into two groups: White and others.

**Supplementary Table S2. Demographics and clinical characteristics of patients who had neutrophilia\*:**

| Variables                                         | Total (n=2989)      | NLR ≤ 12 (n=1562) | NLR > 12 (n=1427)    | p, OR (95% C.I.)                    |
|---------------------------------------------------|---------------------|-------------------|----------------------|-------------------------------------|
| <b>Age, median (IQR)</b>                          | 78 (66, 88)         | 76 (65, 87)       | 80 (67, 89)          | <b>&lt;0.001</b>                    |
| <b>Sex, no. (%)</b>                               |                     |                   |                      |                                     |
| Male                                              | 1607 (53.8)         | 795 (50.9)        | 812 (56.9)           | <b>0.001, 1.27 (1.10, 1.47)</b>     |
| <b>Race, no. (%)</b>                              |                     |                   |                      | <b>0.353**</b>                      |
| White                                             | 2837 (94.9)         | 1474 (94.4)       | 1363 (95.5)          |                                     |
| Asian                                             | 26 (0.9)            | 15 (1)            | 11 (0.8)             |                                     |
| African American                                  | 39 (1.3)            | 26 (1.7)          | 13 (0.9)             |                                     |
| Others                                            | 87 (2.9)            | 47 (3)            | 40 (2.8)             |                                     |
| <b>Ethnicity, no. (%)</b>                         |                     |                   |                      | 0.366                               |
| Non-Hispanic                                      | 2888 (96.6)         | 1508 (96.5)       | 1380 (96.7)          |                                     |
| Hispanic                                          | 44 (1.5)            | 27 (1.7)          | 17 (1.2)             |                                     |
| Unknown/Other                                     | 57 (1.9)            | 27 (1.7)          | 30 (2.1)             |                                     |
| <b>Comorbidities, no. (%)</b>                     |                     |                   |                      |                                     |
| Congestive heart failure                          | 807 (27)            | 416 (26.6)        | 391 (27.4)           | 0.637, 1.04 (0.89, 1.22)            |
| COPD                                              | 1020 (34.1)         | 484 (31)          | 536 (37.6)           | <b>&lt;0.001, 1.34 (1.15, 1.56)</b> |
| Diabetes                                          | 897 (30)            | 488 (31.2)        | 409 (28.7)           | 0.124, 0.88 (0.76, 1.03)            |
| Chronic kidney disease                            | 832 (27.8)          | 427 (27.3)        | 405 (28.4)           | 0.525, 1.05 (0.90, 1.24)            |
| Malignancy                                        | 681 (22.8)          | 339 (21.7)        | 342 (24)             | 0.141, 1.14 (0.96, 1.35)            |
| <b>Neutrophil/lymphocyte ratio, median, (IQR)</b> | 11.55 (7.16, 19.55) | 7.35 (5.16, 9.57) | 19.99 (15.01, 28.42) | <b>&lt;0.001</b>                    |
| <b>Clinical Severity Scores</b>                   |                     |                   |                      |                                     |
| Pneumonia Severity Index, median (IQR )           | 113 (88, 142)       | 109 (84, 136)     | 119 (92, 147)        | <b>&lt;0.001</b>                    |
| CURB 65                                           | 3 (2, 3)            | 3 (2, 3)          | 3 (2, 4)             | <b>&lt;0.001</b>                    |
| APACHE III                                        | 65 (52, 79)         | 63 (49, 79)       | 66 (53, 81)          | <b>0.010</b>                        |

APACHE: Acute Physiology and Chronic Health Evaluation, CI: Confidence interval, COPD: Chronic Obstructive Pulmonary Disease, NLR: Neutrophil Lymphocyte ratio, IQR: interquartile range, OR: Odds ratio.

\*Neutrophilia was defined as having an absolute neutrophile count of  $> 6.45 \times 10^9$ .

\*\* To address the issue of a high number of cells having an expected count of less than 5, the race categories were merged for comparison purposes into two groups: White and others.

**Supplementary Table S3. Primary and Secondary Outcomes of patients who had neutrophilia\* based on NLR:**

| Variables                                                                 | Total (n=2989)      | NLR ≤ 12<br>(n=1562) | NLR > 12<br>(n=1427) | Univariable analysis |                | Multivariable analysis** |                |
|---------------------------------------------------------------------------|---------------------|----------------------|----------------------|----------------------|----------------|--------------------------|----------------|
|                                                                           |                     |                      |                      | Odds ratio (95% CI)  | P value        | Odds ratio (95% CI)      | P value        |
| <b>Hospital mortality, no. (%)</b>                                        | 89 (3)              | 40 (2.6)             | 49 (3.4)             | 1.35 (0.89, 2.07)    | 0.161          | 1.07 (0.69, 1.66)        | 0.758          |
| <b>Mortality at 6 months, no. (%)</b>                                     | 438 (14.7)          | 200 (12.8)           | 238 (16.7)           | 1.36 (1.11, 1.67)    | 0.003          | 1.17 (0.95, 1.45)        | 0.141          |
| <b>Need for invasive mechanical ventilation, no. (%)</b>                  | 545 (18.2)          | 269 (17.2)           | 276 (19.3)           | 1.15 (0.96, 1.39)    | 0.134          | 0.99 (0.81, 1.2)         | 0.885          |
| <b>Need for invasive and non-invasive mechanical ventilation, no. (%)</b> | 1044 (34.9)         | 524 (33.5)           | 520 (36.4)           | 1.14 (0.98, 1.32)    | 0.097          | 0.96 (0.82, 1.13)        | 0.610          |
| <b>ICU admission</b>                                                      | 1240 (41.5)         | 586 (37.5)           | 654 (45.8)           | 1.41 (1.22, 1.63)    | <0.001         | 1.17 (0.99, 1.38)        | 0.062          |
|                                                                           |                     |                      |                      |                      | <b>P value</b> | <b>Estimate (95% CI)</b> | <b>P value</b> |
| <b>Hospital free days, median (IQR)</b>                                   | 23.99 (21.01, 25.4) | 24.1 (21.34, 25.61)  | 23.85 (20.34, 25.31) |                      | <0.001         | -0.25 (-0.67, 0.17)      | 0.249          |

CI: Confidence interval, ICU: intensive care unit, IQR: interquartile range, NLR: Neutrophil Lymphocyte ratio, OR: Odds ratio.

\*Neutrophilia was defined as having an absolute neutrophil count of  $> 6.45 \times 10^9$ .

\*\*Data were analyzed using multivariable regression models adjusting for pneumonia severity index. NLR ≤ 12 was the reference.

**Supplementary Table S4. Demographics and clinical characteristics of patients who had lymphopenia\*:**

| Variables                                         | Total (n=1905)       | NLR ≤ 12 (n=629)   | NLR > 12 (n=1276)    | p, OR (95% C.I.)                    |
|---------------------------------------------------|----------------------|--------------------|----------------------|-------------------------------------|
| <b>Age, median (IQR)</b>                          | 80 (68, 89)          | 80 (68, 89)        | 80 (68, 88)          | 0.651                               |
| <b>Sex , no. (%)</b>                              |                      |                    |                      | 0.300, 1.11 (0.91, 1.34)            |
| Male                                              | 1122 (58.9)          | 360 (57.2)         | 762 (59.7)           |                                     |
| <b>Race, no. (%)</b>                              |                      |                    |                      | 0.060, 0.68 (0.45, 1.02)**          |
| White                                             | 1804 (94.7)          | 587 (93.3)         | 1217 (95.4)          |                                     |
| Asian                                             | 18 (0.9)             | 8 (1.3)            | 10 (0.8)             |                                     |
| African American                                  | 17 (0.9)             | 5 (0.8)            | 12 (0.9)             |                                     |
| Others                                            | 66 (3.5)             | 29 (4.6)           | 37 (2.9)             |                                     |
| <b>Ethnicity, no. (%)</b>                         |                      |                    |                      | 0.624                               |
| Non-Hispanic                                      | 1842 (96.7)          | 610 (97)           | 1232 (96.6)          |                                     |
| Hispanic                                          | 28 (1.5)             | 10 (1.6)           | 18 (1.4)             |                                     |
| Unknown/Other                                     | 35 (1.8)             | 9 (1.4)            | 26 (2)               |                                     |
| <b>Comorbidities, no. (%)</b>                     |                      |                    |                      |                                     |
| Congestive heart failure                          | 530 (27.8)           | 175 (27.8)         | 355 (27.8)           | 1.000, 1.00 (0.81, 1.24)            |
| COPD                                              | 673 (35.3)           | 186 (29.6)         | 487 (38.2)           | <b>&lt;0.001, 1.47 (1.20, 1.81)</b> |
| Diabetes                                          | 524 (27.5)           | 169 (26.9)         | 355 (27.8)           | 0.661, 1.05 (0.85, 1.30)            |
| Chronic kidney disease                            | 574 (30.1)           | 182 (28.9)         | 392 (30.7)           | 0.424, 1.09 (0.88, 1.34)            |
| Malignancy                                        | 489 (25.7)           | 167 (26.6)         | 322 (25.2)           | 0.537, 0.93 (0.75, 1.16)            |
| <b>Neutrophil/lymphocyte ratio, median, (IQR)</b> | 15.88 (10.19, 25.01) | 8.19 (6.09, 10.13) | 21.25 (15.78, 30.13) | <b>&lt;0.001</b>                    |
| <b>Clinical Severity Scores</b>                   |                      |                    |                      |                                     |
| Pneumonia Severity Index, median (IQR )           | 118 (93, 145)        | 115 (90, 139)      | 121 (94, 148)        | <b>&lt;0.001</b>                    |
| CURB 65                                           | 3 (2, 4)             | 3 (2, 3)           | 3 (2, 4)             | <b>&lt;0.001</b>                    |
| APACHE III                                        | 66 (53, 81)          | 63 (52, 79)        | 67 (54, 82)          | 0.102                               |

APACHE: Acute Physiology and Chronic Health Evaluation, CI: Confidence interval, COPD: Chronic Obstructive Pulmonary Disease, NLR: Neutrophil Lymphocyte ratio, IQR: interquartile range, OR: Odds ratio.

\* Lymphopenia was defined as having an absolute lymphocyte count of < 0.95\*10<sup>9</sup>.

\*\* To address the issue of a high number of cells having an expected count of less than 5, the race categories were merged for comparison purposes into two groups: White and others.

**Supplementary Table S5. Primary and Secondary Outcomes of patients who had lymphopenia\* based on NLR:**

| Variables                                                          | Total (n=1905)     | NLR ≤ 12<br>(n=629)  | NLR > 12<br>(n=1276) | Univariable analysis |                | Multivariable analysis** |                |
|--------------------------------------------------------------------|--------------------|----------------------|----------------------|----------------------|----------------|--------------------------|----------------|
|                                                                    |                    |                      |                      | Odds ratio (95% CI)  | P value        | Odds ratio (95% CI)      | P value        |
| Hospital mortality, no. (%)                                        | 78 (4.1)           | 26 (4.1)             | 52 (4.1)             | 0.99 (0.61, 1.59)    | 0.952          | 0.84 (0.51, 1.38)        | 0.491          |
| Mortality at 6 months, no. (%)                                     | 340 (17.8)         | 114 (18.1)           | 226 (17.7)           | 0.97 (0.76, 1.25)    | 0.825          | 0.86 (0.67, 1.12)        | 0.270          |
| Need for invasive mechanical ventilation, no. (%)                  | 341 (17.9)         | 96 (15.3)            | 245 (19.2)           | 1.32 (1.02, 1.71)    | 0.035          | 1.18 (0.9, 1.55)         | 0.226          |
| Need for invasive and non-invasive mechanical ventilation, no. (%) | 650 (34.1)         | 182 (28.9)           | 468 (36.7)           | 1.42 (1.16, 1.75)    | <0.001         | <b>1.3 (1.05, 1.62)</b>  | <b>0.018</b>   |
| ICU admission                                                      | 812 (42.6)         | 218 (34.7)           | 594 (46.6)           | 1.64 (1.35, 2.00)    | <0.001         | <b>1.54 (1.23, 1.92)</b> | <b>0.000</b>   |
|                                                                    |                    |                      |                      |                      | <b>P value</b> | <b>Estimate (95% CI)</b> | <b>P value</b> |
| Hospital free days, median (IQR)                                   | 23.8 (20.3, 25.32) | 23.82 (20.55, 25.42) | 23.79 (20.21, 25.26) |                      | 0.234          | 0.08 (-0.52, 0.68)       | 0.800          |

CI: Confidence interval, ICU: intensive care unit, IQR: interquartile range, NLR: Neutrophil Lymphocyte ratio, OR: Odds ratio.

\* Lymphopenia was defined as having an absolute lymphocyte count of  $< 0.95 \times 10^9$ .

\*\*Data were analyzed using multivariable regression models adjusting for pneumonia severity index. NLR ≤ 12 was the reference.

**Supplementary Table S6. Demographics and clinical characteristics of patients according to their in-hospital mortality status:**

| Variables                                         | Total (n=4039)     | Discharged alive (n=3911) | Died during admission (n=128) | p, OR (95% C.I.)                  |
|---------------------------------------------------|--------------------|---------------------------|-------------------------------|-----------------------------------|
| <b>Age, median (IQR)</b>                          | 78 (65, 88)        | 78 (65, 88)               | 79 (70, 91)                   | <b>0.035</b>                      |
| <b>Sex, no. (%)</b>                               |                    |                           |                               | <b>0.011, 1.61 (1.11, 2.33)</b>   |
| Male                                              | 2172 (53.8)        | 2089 (53.4)               | 83 (64.8)                     |                                   |
| <b>Race, no. (%)</b>                              |                    |                           |                               | 0.542, 1.24 (0.62, 2.47)*         |
| White                                             | 3805 (94.2)        | 3686 (94.2)               | 119 (93)                      |                                   |
| Asian                                             | 42 (1)             | 42 (1.1)                  | 0                             |                                   |
| African American                                  | 64 (1.6)           | 63 (1.6)                  | 1 (0.8)                       |                                   |
| Others                                            | 128 (3.2)          | 120 (3.1)                 | 8 (6.3)                       |                                   |
| <b>Ethnicity, no. (%)</b>                         |                    |                           |                               | <b>0.005, 2.71 (1.43, 5.16)**</b> |
| Non-Hispanic                                      | 3897 (96.5)        | 3780 (96.7)               | 117 (91.4)                    |                                   |
| Hispanic                                          | 65 (1.6)           | 64 (1.6)                  | 1 (0.8)                       |                                   |
| Unknown/Other                                     | 77 (1.9)           | 67 (1.7)                  | 10 (7.8)                      |                                   |
| <b>Comorbidities, no. (%)</b>                     |                    |                           |                               |                                   |
| Congestive heart failure                          | 1118 (27.7)        | 1072 (27.4)               | 46 (35.9)                     | <b>0.034, 1.49 (1.03, 2.15)</b>   |
| COPD                                              | 1310 (32.4)        | 1274 (32.6)               | 36 (28.1)                     | 0.29, 0.81 (0.55, 1.20)           |
| Diabetes                                          | 1220 (30.2)        | 1185 (30.3)               | 35 (27.3)                     | 0.474, 0.87 (0.58, 1.29)          |
| Chronic kidney disease                            | 1159 (28.7)        | 1108 (28.3)               | 51 (39.8)                     | <b>0.005, 1.68 (1.17, 2.40)</b>   |
| Malignancy                                        | 948 (23.5)         | 917 (23.4)                | 31 (24.2)                     | 0.839, 1.04 (0.69, 1.57)          |
| <b>Neutrophil/lymphocyte ratio, median, (IQR)</b> | 9.26 (5.13, 16.35) | 9.2 (5.08, 16.18)         | 11.62 (6.4, 21.66)            | <b>0.007</b>                      |
| <b>Clinical Severity Scores</b>                   |                    |                           |                               |                                   |
| Pneumonia Severity Index, median (IQR )           | 113 (87, 141)      | 112 (86, 140)             | 154 (131, 183)                | <b>&lt;0.001</b>                  |
| CURB 65                                           | 3 (2, 3)           | 3 (2, 3)                  | 4 (3, 4)                      | <b>&lt;0.001</b>                  |
| APACHE III                                        | 65 (52, 80)        | 64 (51, 78)               | 82 (67, 106)                  | <b>&lt;0.001</b>                  |

APACHE: Acute Physiology and Chronic Health Evaluation, CI: Confidence interval, COPD: Chronic Obstructive Pulmonary Disease, NLR: Neutrophil Lymphocyte ratio, IQR: interquartile range, OR: Odds ratio.

\* To address the issue of a high number of cells having an expected count of less than 5, the race categories were merged for comparison purposes into two groups: White and others.

\* To address the issue of a high number of cells having an expected count of less than 5, the ethnicity categories were merged for comparison purposes into two groups: non-Hispanic and others.
